# Supplementary material for: Loss of C/EBPδ Exacerbates Radiation-Induced Cognitive Decline in Aged Mice due to Impaired Oxidative Stress Response
Source: MDPI journal article supplement (doi:10.3390/ijms20040885), 2019-02-18
Supplement: s1 [file s1]

## Supplementary Materials

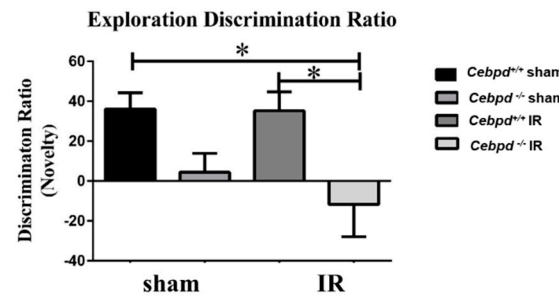

**Supplementary Figure 1.** Discrimination ratio of sham and irradiated aged *Cebpd*<sup>+/+</sup> and *Cebpd*<sup>-/-</sup> mice. The DI shows reduced exploratory preference for the novel object over the familiar object in KO-IR resulting in negative discrimination ratio. *N*=5-7 mice/treatment. DI, discrimination index. Average  $\pm$  SEM; \**p* < 0.05.

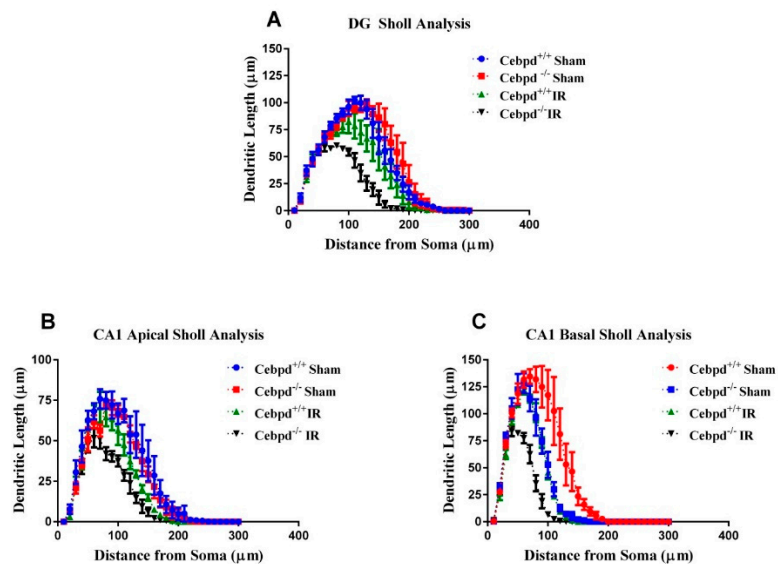

**Supplementary Figure 2.** Combined Sholl analyses of neurons in DG, CA1 apical and CA1 basal regions depicted in Figures 3, 4 and 5.

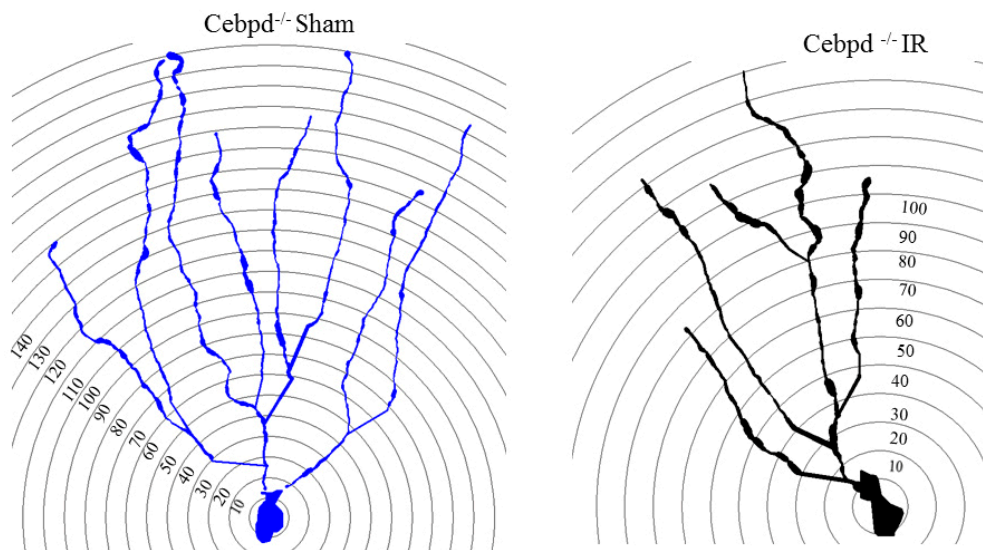

**Supplementary Figure 3:** Representative tracings of DG granule neurons superimposed over concentric rings (10  $\mu$ M) used for Sholl analysis.
